# Supplementary material for: Three Si-substituted polyoxovanadates as efficient catalysts for Knoevenagel condensation and selective oxidation of styrene to benzaldehyde
Source: Royal Society of Chemistry journal article supplement (doi:10.1039/d1dt03862a), 2022-01-01
Supplement: d1dt03862a1.pdf [file d1dt03862a1.pdf]

Electronic Supplementary Material (ESI) for Dalton Transactions.

## Supporting Information for

### Three Si-substituted polyoxovanadates as efficient catalysts for Knoevenagel condensation and selective oxidation of styrene to benzaldehyde

Yu Shi <sup>a</sup>, Tong Zhou <sup>a</sup>, Jia-Qi Di <sup>a</sup>, Wenhui Wang <sup>a</sup>, Li Ma <sup>a,\*</sup>, Heng Zhang <sup>a</sup>, and Yuanzhe Gao <sup>a,\*</sup>

*Hebei Key Laboratory of Inorganic Nano-materials, National Experimental Chemistry Teaching Center, College of Chemistry and Material Science, Hebei Normal University, Shijiazhuang, 050024, P. R. China.*

#### Contents:

#### Materials and methods

**Table S1.** BVS values of V and Si atoms of compounds **1-3**.

**Table S2.** The select bonds (Å) and angles (°) of compounds **1-3**.

**Table S3.** Selective oxidation of styrene to benzaldehyde with different catalysts.

**Table S4.** The parameters of BET surface area and pore size of compounds **1-3**.

**Fig. S1.** The 2D bilayer structure of compound **1**.

**Fig. S2.** FT-IR spectra of compounds **1-3**.

**Fig. S3.** Simulated and experimental PXRD patterns of compounds **1-3**.

**Fig. S4.** TG curves of compounds **1-3**.

**Fig. S5.** XPS spectra of compound **1**.

**Fig. S6.** XPS spectra of compound **2**.

**Fig. S7.** XPS spectra of compound **3**.

**Fig. S8.** Recycling of compound **1** for Knoevenagel condensation.

**Fig. S9.** The FT-IR spectra and PXRD patterns of the reused compound **1** in the Knoevenagel condensation.

**Fig. S10.** SEM images of crystal and powder in compounds **1-3**.

**Fig. S11.** N<sub>2</sub> adsorption-desorption isotherm and pore-size distribution of compounds **1-3**.

**Fig. S12.** Recycling of compound **1** for catalytic oxidation of styrene.

**Fig. S13.** The FT-IR spectra of the reused compound **1** in the catalytic oxidation of styrene.

**Fig. S14.** Diagram showing anisotropic displacement parameters (ADPs) of compound **1**.

**Fig. S15.** Diagram showing anisotropic displacement parameters (ADPs) of compound **2**.

**Fig. S16.** Diagram showing anisotropic displacement parameters (ADPs) of compound **3**.

**Fig. S17.**  $^1\text{H}$  NMR spectra of the products from the Knoevenagel condensation reactions.

**Fig. S18.** The EDS spectra of compound **1**.

### Materials and methods.

All chemicals were used as purchased without purification. Hydrothermal synthesis was carried out with a 23 mL Teflon-lined autoclave under autogenous pressure, the reaction vessels were filled to approximately 25% of their volume capacity. FT-IR spectra were recorded in KBr pellets with FTIR-8900 IR spectrometer in the range of  $4000\text{-}500\text{ cm}^{-1}$ . Powder X-ray diffraction (PXRD) was performed on a Bruker AXS D8 Advance diffractometer. TGA analyses were performed on a Perkin-Elmer Pyris Diamond TG/DTA instrument in flowing  $\text{N}_2$  with a heating rate of  $10\text{ }^\circ\text{C min}^{-1}$ . X-ray photoelectron spectroscopy (XPS) measurements were performed on a Thermo ESCALAB 250 X-ray photoelectron spectrometer. The reaction products were analyzed by GC (Agilent, GC-7980B with an FID detector equipped with a DB-FFAP capillary column).  $^1\text{H}$  NMR spectra were measured on a Bruker 500 MHz spectrometer.

**Table S1.** BVS values of V and Si atoms of compounds **1-3**.

| Compound <b>1</b> |               |          |               |          |               |
|-------------------|---------------|----------|---------------|----------|---------------|
| elements          | valence state | elements | valence state | elements | valence state |
| V1                | 4.047         | V5       | 4.024         | Si1      | 4.008         |
| V2                | 4.133         | V6       | 4.066         | Si2      | 4.017         |

|                   |               |          |               |          |               |
|-------------------|---------------|----------|---------------|----------|---------------|
| V3                | 3.973         | V7       | 4.122         | Si3      | 3.925         |
| V4                | 4.144         | V8       | 4.105         |          |               |
| <b>Compound 2</b> |               |          |               |          |               |
| elements          | valence state | elements | valence state | elements | valence state |
| V1                | 4.113         | V5       | 4.079         | Si1      | 4.008         |
| V2                | 4.110         | V6       | 4.068         | Si2      | 3.946         |
| V3                | 4.093         | V7       | 4.129         |          |               |
| V4                | 4.148         | V8       | 4.086         |          |               |
| <b>Compound 3</b> |               |          |               |          |               |
| elements          | valence state | elements | valence state | elements | valence state |
| V1                | 4.132         | V5       | 4.151         | Si1      | 3.997         |
| V2                | 3.994         | V6       | 4.059         | Si2      | 3.957         |
| V3                | 4.145         | V7       | 4.086         |          |               |
| V4                | 4.062         | V8       | 4.103         |          |               |

**Table S2.** The select bonds and angles of compounds **1-3**.

| <b>Compound 1</b> |           |               |           |            |           |
|-------------------|-----------|---------------|-----------|------------|-----------|
| Bonds             | Å         | Bonds         | Å         | Bonds      | Å         |
| Cd(1)-O(42)       | 2.188(11) | Si(1)-O(10)   | 1.626(10) | V(4)-O(14) | 1.606(11) |
| Cd(1)-O(43)       | 2.235(10) | Si(1)#3-O(43) | 1.590(11) | V(4)-O(38) | 1.933(10) |
| Cd(1)-N(4)        | 2.25(2)   | Si(2)-O(7)    | 1.618(10) | V(4)-O(48) | 1.947(10) |
| Cd(1)-N(5)        | 2.40(3)   | Si(2)-O(9)    | 1.607(11) | V(4)-O(33) | 1.965(10) |
| Cd(1)-N(6)        | 2.27(6)   | Si(2)-O(2)    | 1.644(12) | V(4)-O(35) | 1.972(11) |
| Cd(2)-O(42)       | 2.231(11) | Si(2)-O(1)    | 1.621(12) | V(5)-O(28) | 1.925(10) |
| Cd(2)-O(43)       | 2.263(10) | Si(3)-O(34)   | 1.636(11) | V(5)-O(23) | 1.998(10) |
| Cd(2)-N(3)        | 2.296(17) | Si(3)-O(35)   | 1.662(11) | V(5)-O(19) | 1.994(11) |
| Cd(2)-N(2)        | 2.413(17) | Si(3)-O(36)   | 1.644(11) | V(5)-O(48) | 1.919(10) |
| Cd(2)-N(1)        | 2.251(15) | Si(3)-O(42)   | 1.586(10) | V(5)-O(13) | 1.629(12) |
| Cd(3)-O(24)       | 2.207(12) | V(1)-O(38)    | 1.935(11) | V(6)-O(5)  | 1.933(10) |
| Cd(3)-O(24)#1     | 2.231(12) | V(1)-O(23)    | 2.020(11) | V(6)-O(7)  | 2.009(10) |
| Cd(3)-N(8)        | 2.367(19) | V(1)-O(37)    | 2.021(11) | V(6)-O(6)  | 2.003(10) |
| Cd(3)-N(9)        | 2.274(18) | V(1)-O(33)    | 1.915(11) | V(6)-O(49) | 1.909(10) |
| Cd(3)-N(7)        | 2.282(18) | V(1)-O(27)    | 1.604(10) | V(6)-O(3)  | 1.613(11) |
| Cd(4)-O(41)       | 2.434(11) | V(2)-O(5)     | 1.936(10) | V(7)-O(5)  | 1.935(11) |
| Cd(4)-O(44)       | 2.520(11) | V(2)-O(38)    | 1.939(10) | V(7)-O(6)  | 2.023(11) |
| Cd(4)-N(14)       | 2.278(18) | V(2)-O(49)    | 1.914(10) | V(7)-O(26) | 1.989(11) |
| Cd(4)-N(10)       | 2.291(18) | V(2)-O(37)    | 2.034(10) | V(7)-O(4)  | 1.593(12) |
| Cd(4)-N(11)       | 2.373(17) | V(2)-O(44)#2  | 1.610(10) | V(7)-O(11) | 1.927(11) |

|              |           |            |           |            |           |
|--------------|-----------|------------|-----------|------------|-----------|
| Cd(4')-N(15) | 1.938(10) | V(3)-O(28) | 1.940(11) | V(8)-O(29) | 1.912(11) |
| Cd(4')-N(14) | 2.52(2)   | V(3)-O(49) | 1.955(10) | V(8)-O(9)  | 2.024(10) |
| Cd(4')-O(41) | 2.092(14) | V(3)-O(7)  | 2.034(9)  | V(8)-O(18) | 1.911(11) |
| Si(1)-O(6)   | 1.630(11) | V(3)-O(48) | 1.940(10) | V(8)-O(10) | 2.018(12) |
| Si(1)-O(2)   | 1.649(12) | V(3)-O(12) | 1.628(12) | V(8)-O(8)  | 1.602(10) |

| Angles            |          | Angles                |          |
|-------------------|----------|-----------------------|----------|
| °                 |          | °                     |          |
| O(42)-Cd(1)-Cd(2) | 39.8(3)  | N(1)-Cd(2)-N(2)       | 76.5(6)  |
| O(42)-Cd(1)-O(43) | 80.5(4)  | O(24)-Cd(3)-Cd(3)#1   | 40.5(3)  |
| O(42)-Cd(1)-N(6)  | 113.3(7) | O(24)#1-Cd(3)-Cd(3)#1 | 40.0(3)  |
| O(42)-Cd(1)-N(5)  | 111.8(7) | O(24)-Cd(3)-O(24)#1   | 80.6(4)  |
| O(42)-Cd(1)-N(4)  | 99.0(7)  | O(24)#1-Cd(3)-N(8)    | 100.7(5) |
| O(43)-Cd(1)-Cd(2) | 40.8(3)  | O(24)-Cd(3)-N(8)      | 173.0(6) |
| O(43)-Cd(1)-N(6)  | 95.3(7)  | O(24)#1-Cd(3)-N(9)    | 113.5(6) |
| O(43)-Cd(1)-N(5)  | 167.5(7) | O(24)-Cd(3)-N(9)      | 96.3(6)  |
| N(6)-Cd(1)-Cd(2)  | 107.5(7) | O(24)-Cd(3)-N(7)      | 109.9(6) |
| N(6)-Cd(1)-N(5)   | 78.4(9)  | O(24)#1-Cd(3)-N(7)    | 94.2(5)  |
| N(5)-Cd(1)-Cd(2)  | 151.4(6) | N(8)-Cd(3)-Cd(3)#1    | 140.3(5) |
| N(4)-Cd(1)-Cd(2)  | 105.5(7) | N(9)-Cd(3)-Cd(3)#1    | 109.5(5) |
| N(4)-Cd(1)-O(43)  | 102.7(7) | N(9)-Cd(3)-N(8)       | 76.9(7)  |
| N(4)-Cd(1)-N(6)   | 145.3(1) | N(9)-Cd(3)-N(7)       | 144.7(7) |
| N(4)-Cd(1)-N(5)   | 77.9(9)  | N(7)-Cd(3)-Cd(3)#1    | 105.7(5) |
| O(42)-Cd(2)-Cd(1) | 38.8(3)  | N(7)-Cd(3)-N(8)       | 77.0(7)  |
| O(42)-Cd(2)-O(43) | 79.0(4)  | O(41)-Cd(4)-O(44)     | 175.4(4) |
| O(42)-Cd(2)-N(3)  | 98.8(5)  | N(14)-Cd(4)-O(41)     | 101.1(5) |
| O(42)-Cd(2)-N(2)  | 173.3(5) | N(14)-Cd(4)-O(44)     | 82.8(5)  |
| O(42)-Cd(2)-N(1)  | 108.8(5) | N(14)-Cd(4)-N(10)     | 94.4(7)  |
| O(43)-Cd(2)-Cd(1) | 40.2(3)  | N(14)-Cd(4)-N(11)     | 169.7(7) |
| O(43)-Cd(2)-N(3)  | 107.6(5) | N(14)-Cd(4')-N(15)    | 88.4(9)  |
| O(43)-Cd(2)-N(2)  | 104.6(5) | N(10)-Cd(4)-O(41)     | 95.3(5)  |
| N(3)-Cd(2)-Cd(1)  | 108.3(5) | N(10)-Cd(4)-O(44)     | 86.9(5)  |
| N(3)-Cd(2)-N(2)   | 74.8(6)  | N(10)-Cd(4)-N(11)     | 79.1(6)  |
| N(2)-Cd(2)-Cd(1)  | 144.7(4) | N(11)-Cd(4)-O(41)     | 87.5(5)  |
| N(1)-Cd(2)-Cd(1)  | 105.9(4) | N(11)-Cd(4)-O(44)     | 88.9(5)  |
| N(1)-Cd(2)-O(43)  | 97.4(5)  | N(15)-Cd(4')-O(41)    | 144.2(1) |
| N(1)-Cd(2)-N(3)   | 145.8(6) | N(14)-Cd(4')-O(41)    | 103.9(7) |

Symmetry transformations used to generate equivalent atoms:

#1 -x+1/2,-y+1/2,-z #2 x+1/2,y+1/2,z #3 x-1/2,y+1/2,z #4 x+1/2,y-1/2,z #5 x-1/2,y-1/2,z

## Compound 2

| Bonds       | Å        | Bonds      | Å        | Bonds      | Å        |
|-------------|----------|------------|----------|------------|----------|
| Co(1)-O(18) | 2.130(3) | Si(2)-O(3) | 1.636(4) | V(4)-O(10) | 1.939(3) |

|                     |           |                      |            |              |            |   |  |
|---------------------|-----------|----------------------|------------|--------------|------------|---|--|
| Co(1)-O(23)         | 2.068(3)  | Si(2)#1-O(11)        | 1.642(3)   | V(4)#3-O(23) | 1.649(3)   |   |  |
| Co(1)-N(3)          | 2.123(6)  | Si(2)-O(14)          | 1.650(3)   | V(5)-O(7)    | 1.949(3)   |   |  |
| Co(1)-N(4)          | 2.131(5)  | Si(2)-O(16)          | 1.590(3)   | V(5)-O(8)    | 1.907(3)   |   |  |
| Co(1)-N(5)          | 2.168(7)  | V(1)-O(2)            | 1.926(3)   | V(5)-O(9)    | 2.011(3)   |   |  |
| Co(1)-N(6)          | 2.144(6)  | V(1)-O(3)            | 2.036(3)   | V(5)-O(13)   | 1.929(3)   |   |  |
| Co(2)-O(17)         | 2.161(3)  | V(1)#1-O(8)          | 1.931(3)   | V(5)-O(18)   | 1.632(3)   |   |  |
| Co(2)-N(7)          | 2.141(9)  | V(1)#1-O(10)         | 1.942(3)   | V(5)-V(7)#1  | 3.0317(10) |   |  |
| Co(2)-N(8)          | 2.126(8)  | V(1)-O(24)           | 1.609(3)   | V(6)-O(6)    | 1.951(3)   |   |  |
| Co(3)-O(16)         | 2.040(4)  | V(1)-V(2)            | 3.0299(11) | V(6)-O(10)   | 1.949(3)   |   |  |
| Co(3)#2-O(16)       | 2.029(4)  | V(2)-O(2)            | 1.910(3)   | V(6)-O(11)   | 2.031(3)   |   |  |
| Co(3')-O(16)        | 2.185(7)  | V(2)-O(3)            | 2.001(3)   | V(6)-O(12)   | 1.938(3)   |   |  |
| Co(3')#2-O(16)      | 2.298(7)  | V(2)-O(4)            | 1.929(3)   | V(6)-O(20)   | 1.605(4)   |   |  |
| Co(3)-O(25W)        | 1.893(10) | V(2)-O(5)            | 1.995(3)   | V(7)#1-O(9)  | 2.001(3)   |   |  |
| Co(3')-N(1)         | 1.525(9)  | V(2)-O(21)           | 1.609(3)   | V(7)-O(11)   | 1.996(3)   |   |  |
| Co(3)-N(1)          | 2.166(8)  | V(3)-O(4)            | 1.926(3)   | V(7)-O(12)   | 1.913(3)   |   |  |
| Co(3)-N(2)          | 2.231(10) | V(3)-O(5)            | 2.020(3)   | V(7)#1-O(13) | 1.914(3)   |   |  |
| Co(3')-N(2)         | 2.242(11) | V(3)-O(6)            | 1.935(3)   | V(7)-O(22)   | 1.611(4)   |   |  |
| Co(3')-Co(3)        | 0.873(6)  | V(3)-O(7)            | 1.940(3)   | V(8)-O(2)    | 1.937(3)   |   |  |
| Si(1)-O(5)          | 1.637(4)  | V(3)-O(19)           | 1.618(3)   | V(8)-O(4)    | 1.941(3)   |   |  |
| Si(1)-O(9)          | 1.625(3)  | V(4)-O(6)            | 1.922(3)   | V(8)-O(12)   | 1.950(3)   |   |  |
| Si(1)-O(14)         | 1.631(4)  | V(4)-O(7)            | 1.933(3)   | V(8)#1-O(13) | 1.952(3)   |   |  |
| Si(1)-O(15)         | 1.620(3)  | V(4)-O(8)            | 1.918(3)   | V(8)-O(17)   | 1.634(3)   |   |  |
| Angles              |           | °                    |            | Angles       |            | ° |  |
| O(23)-Co(1)-N(3)    | 95.82(17) | N(7)-Co(2)-O(17)     | 90.0(2)    |              |            |   |  |
| O(23)-Co(1)-O(18)   | 86.58(13) | N(8)#4-Co(2)-O(17)#4 | 88.2(2)    |              |            |   |  |
| N(3)-Co(1)-O(18)    | 87.65(18) | N(8)-Co(2)-O(17)#4   | 91.8(2)    |              |            |   |  |
| O(23)-Co(1)-N(4)    | 177.4(2)  | N(7)#4-Co(2)-O(17)#4 | 90.0(2)    |              |            |   |  |
| N(3)-Co(1)-N(4)     | 81.7(2)   | N(7)-Co(2)-O(17)#4   | 90.0(2)    |              |            |   |  |
| O(18)-Co(1)-N(4)    | 93.98(18) | O(17)-Co(2)-O(17)#4  | 180.00(8)  |              |            |   |  |
| O(23)-Co(1)-N(6)    | 88.0(2)   | Co(3')-Co(3)-O(25W)  | 155.8(5)   |              |            |   |  |
| N(3)-Co(1)-N(6)     | 175.6(2)  | Co(3')-Co(3)-O(16)#2 | 96.6(4)    |              |            |   |  |
| O(18)-Co(1)-N(6)    | 90.5(2)   | O(25W)-Co(3)-O(16)#2 | 102.1(3)   |              |            |   |  |
| N(4)-Co(1)-N(6)     | 94.6(3)   | O(25W)-Co(3)-O(16)   | 111.0(3)   |              |            |   |  |
| N(8)#4-Co(2)-N(8)   | 180.0     | O(16)#2-Co(3)-O(16)  | 83.62(14)  |              |            |   |  |
| N(8)#4-Co(2)-N(7)#4 | 82.1(5)   | O(25W)-Co(3)-N(1)    | 126.3(4)   |              |            |   |  |
| N(8)-Co(2)-N(7)#4   | 97.9(5)   | O(16)#2-Co(3)-N(1)   | 94.7(3)    |              |            |   |  |
| N(8)#4-Co(2)-N(7)   | 97.9(5)   | O(16)-Co(3)-N(1)     | 121.4(2)   |              |            |   |  |
| N(8)-Co(2)-N(7)     | 82.1(5)   | Co(3')-Co(3)-N(2)    | 79.4(5)    |              |            |   |  |
| N(7)#4-Co(2)-N(7)   | 180.0     | O(25W)-Co(3)-N(2)    | 81.3(4)    |              |            |   |  |
| N(8)#4-Co(2)-O(17)  | 91.8(2)   | O(16)#2-Co(3)-N(2)   | 175.7(3)   |              |            |   |  |

|                    |         |                  |         |
|--------------------|---------|------------------|---------|
| N(8)-Co(2)-O(17)   | 88.2(2) | O(16)-Co(3)-N(2) | 97.7(3) |
| N(7)#4-Co(2)-O(17) | 90.0(2) | N(1)-Co(3)-N(2)  | 81.1(3) |

Symmetry transformations used to generate equivalent atoms:

#1 -x,-y,-z+2    #2 -x,-y,-z+1    #3 -x-1,-y,-z+2    #4 -x,-y-1,-z+2

### Compound 3

| Bond               | Å          | Bonds            | Å          | Bonds        | Å        |
|--------------------|------------|------------------|------------|--------------|----------|
| Co(1)-O(2)         | 2.093(3)   | V(1)-O(3)        | 1.617(3)   | V(5)-O(8)    | 1.917(3) |
| Co(1)#4-O(22)      | 2.087(4)   | V(1)-O(12)       | 1.988(3)   | V(5)-O(9)    | 1.934(3) |
| Co(1)-N(1)         | 2.137(4)   | V(1)-O(13)       | 1.908(3)   | V(5)-O(11)   | 1.918(3) |
| Co(1)-N(2)         | 2.166(5)   | V(1)-O(19)       | 1.997(3)   | V(5)-O(10)   | 2.009(3) |
| Co(1)-N(3)         | 2.172(5)   | V(1)-O(24)       | 1.910(3)   | V(5)-O(22)   | 1.622(3) |
| Co(1)-N(4)         | 2.147(4)   | V(2)-O(9)        | 1.962(3)   | V(6)-O(10)   | 1.936(3) |
| Co(2)-O(3)         | 2.109(3)   | V(2)-O(12)       | 2.108(3)   | V(6)-O(11)   | 2.002(3) |
| Co(2)-O(18)        | 2.084(3)   | V(2)-O(13)       | 1.942(3)   | V(6)-O(14)   | 1.931(3) |
| Co(2)-N(5)         | 2.162(4)   | V(2)#3-O(16)     | 1.947(3)   | V(6)-O(15)   | 1.999(3) |
| Co(2)-N(6)         | 2.127(5)   | V(2)-O(5)        | 1.595(3)   | V(6)-O(21)   | 1.607(3) |
| Co(2)-N(7)         | 2.147(4)   | V(3)-O(2)        | 1.652(3)   | V(7)-O(7)    | 1.603(3) |
| Co(2)-N(8)         | 2.135(4)   | V(3)-O(8)        | 1.911(3)   | V(7)-O(14)   | 1.941(3) |
| Si(1)-O(6)         | 1.620(3)   | V(3)-O(9)        | 1.931(3)   | V(7)-O(15)   | 2.034(3) |
| Si(1)-O(15)        | 1.621(3)   | V(3)#3-O(16)     | 1.921(3)   | V(7)-O(16)   | 1.931(3) |
| Si(1)-O(19)        | 1.631(3)   | V(3)#3-O(17)     | 1.945(3)   | V(7)-O(17)   | 1.959(3) |
| Si(1)-O(20)        | 1.624(3)   | V(4)-O(4)        | 1.614(3)   | V(8)#1-O(10) | 1.936(3) |
| Si(2)-O(11)        | 1.624(3)   | V(4)-O(8)        | 1.949(3)   | V(8)#2-O(13) | 1.946(3) |
| Si(2)-O(12)        | 1.627(3)   | V(4)#3-O(17)     | 1.940(3)   | V(8)#1-O(14) | 1.951(3) |
| Si(2)-O(20)        | 1.640(3)   | V(4)#3-O(19)     | 2.029(3)   | V(8)-O(18)   | 1.629(3) |
| Si(2)-O(23)        | 1.620(3)   | V(4)#3-O(24)     | 1.932(3)   | V(8)#2-O(24) | 1.949(3) |
| Angles             | °          | Angles           | °          |              |          |
| O(22)#4-Co(1)-O(2) | 89.98(14)  | O(18)-Co(2)-O(3) | 94.09(13)  |              |          |
| O(22)#4-Co(1)-N(1) | 86.02(17)  | O(18)-Co(2)-N(6) | 87.73(17)  |              |          |
| O(2)-Co(1)-N(1)    | 91.55(15)  | O(3)-Co(2)-N(6)  | 88.02(19)  |              |          |
| O(22)#4-Co(1)-N(4) | 89.10(17)  | O(18)-Co(2)-N(8) | 87.34(16)  |              |          |
| O(2)-Co(1)-N(4)    | 86.23(17)  | O(3)-Co(2)-N(8)  | 89.63(15)  |              |          |
| N(1)-Co(1)-N(4)    | 174.6(2)   | N(6)-Co(2)-N(8)  | 174.37(18) |              |          |
| O(22)#4-Co(1)-N(2) | 94.12(17)  | O(18)-Co(2)-N(7) | 96.17(16)  |              |          |
| O(2)-Co(1)-N(2)    | 171.28(17) | O(3)-Co(2)-N(7)  | 166.05(15) |              |          |
| N(1)-Co(1)-N(2)    | 81.09(19)  | N(6)-Co(2)-N(7)  | 101.8(2)   |              |          |
| N(4)-Co(1)-N(2)    | 101.5(2)   | N(8)-Co(2)-N(7)  | 81.45(18)  |              |          |
| O(22)#4-Co(1)-N(3) | 168.09(15) | O(18)-Co(2)-N(5) | 167.50(16) |              |          |
| O(2)-Co(1)-N(3)    | 95.42(16)  | O(3)-Co(2)-N(5)  | 90.28(16)  |              |          |
| N(1)-Co(1)-N(3)    | 104.40(19) | N(6)-Co(2)-N(5)  | 80.71(19)  |              |          |

|                                                             |                   |                 |                   |
|-------------------------------------------------------------|-------------------|-----------------|-------------------|
| N(4)-Co(1)-N(3)                                             | 80.69(19)         | N(8)-Co(2)-N(5) | 104.42(18)        |
| N(2)-Co(1)-N(3)                                             | 82.0(2)           | N(7)-Co(2)-N(5) | 81.66(18)         |
| Symmetry transformations used to generate equivalent atoms: |                   |                 |                   |
| #1 $x+1,y,z$                                                | #2 $-x-1,-y,-z+2$ | #3 $-x,-y,-z+2$ | #4 $-x,-y+1,-z+2$ |
|                                                             |                   |                 | #5 $x-1,y,z$      |

**Table S3.** Selective oxidation of styrene to benzaldehyde with different catalysts<sup>a</sup>

| Entry | Catalyst                      | Time   | Conv. <sup>b</sup> (%) | Sele. <sup>b</sup> (%) |
|-------|-------------------------------|--------|------------------------|------------------------|
| 1     | <b>1</b>                      | 15 min | 97.6                   | 100                    |
| 2     | <b>2</b>                      | 2.5 h  | 98.8                   | 100                    |
| 3     | <b>3</b>                      | 3 h    | 96.6                   | 96.17                  |
| 4     | blank                         | 1h     | 0                      | 0                      |
| 5     | TEOS                          | 1h     | 0                      | 0                      |
| 6     | CdCl <sub>2</sub>             | 1h     | 11.5                   | 100                    |
| 7     | V <sub>2</sub> O <sub>5</sub> | 1h     | 100                    | 16.3                   |

<sup>a</sup>Reaction conditions: styrene (0.40 mmol), 30% H<sub>2</sub>O<sub>2</sub> (1 mmol), catalyst (20 mg), solvent (2 mL) at 80 °C. <sup>b</sup>Determined by GC analysis.

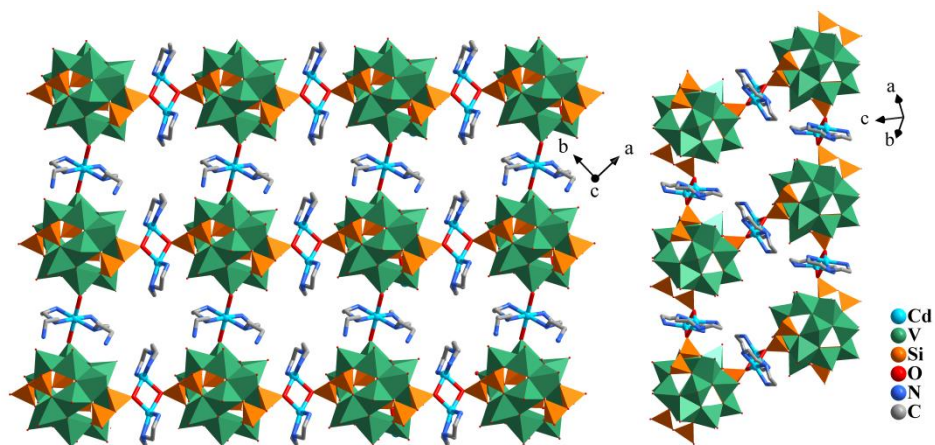

**Fig. S1.** The 2D bilayer structure of compound **1**.

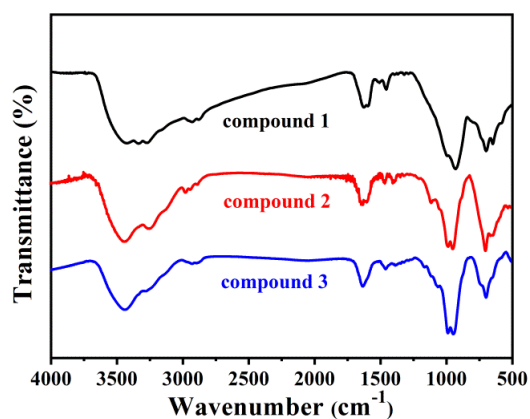

**Fig. S2.** FT-IR spectra of compounds **1-3**.

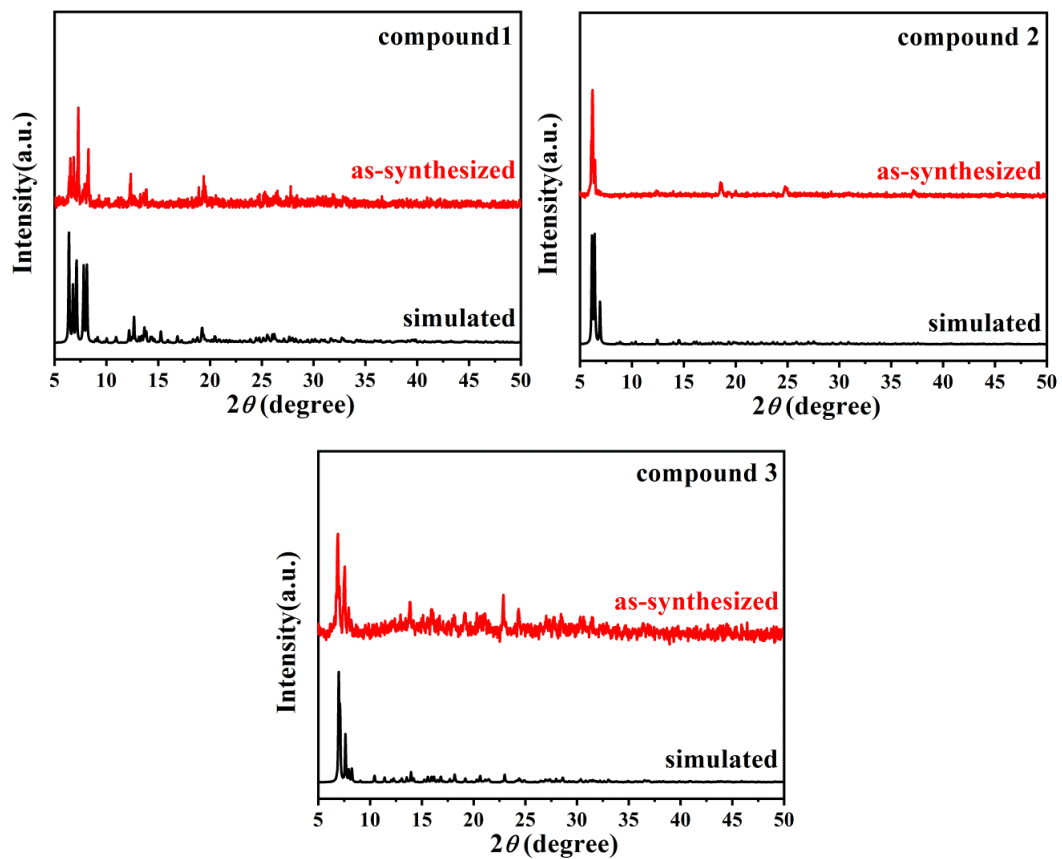

**Fig. S3.** Simulated and experimental PXRD patterns of compounds 1-3.

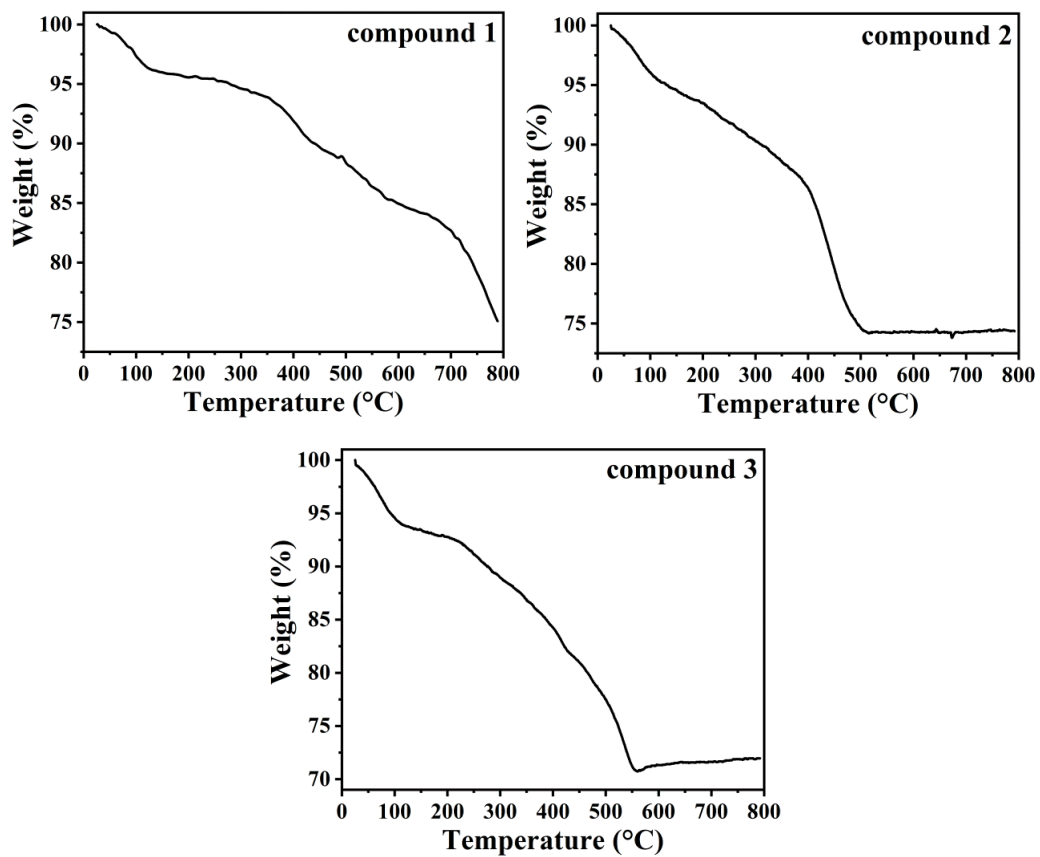

**Fig. S4.** TG curves of compounds 1-3.



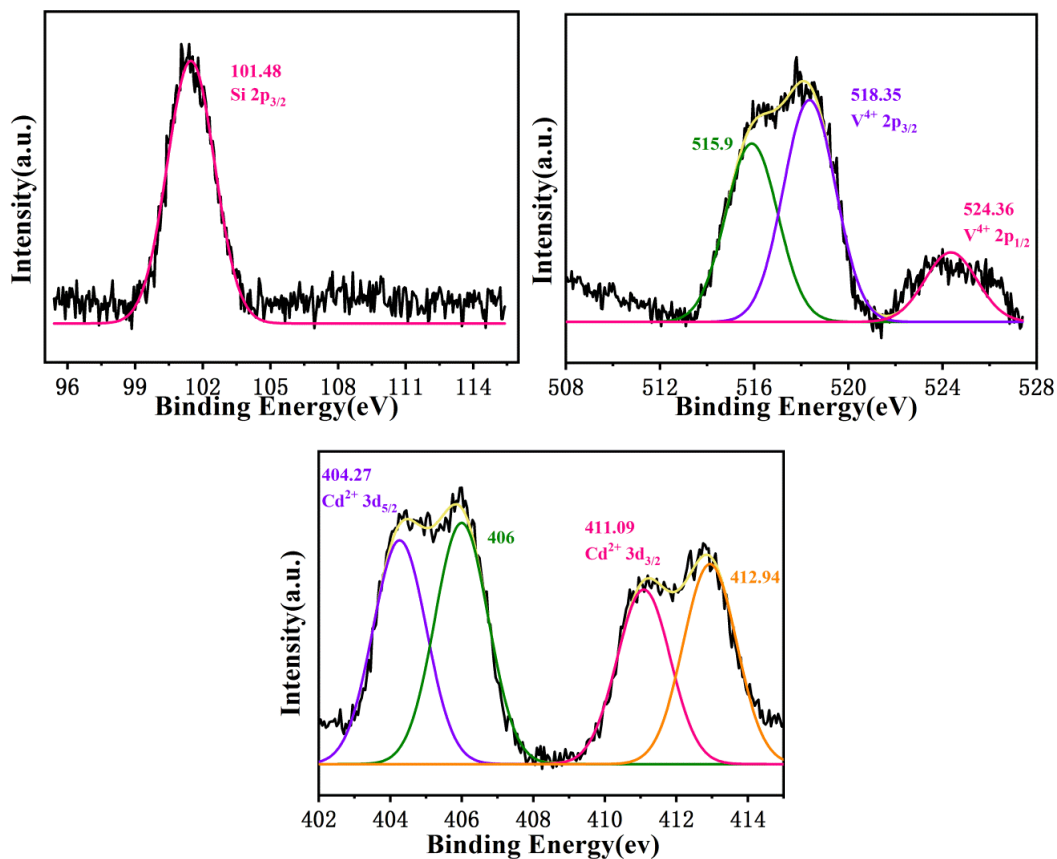

Fig. S5. XPS spectra of compound 1: Si, V, Cd.

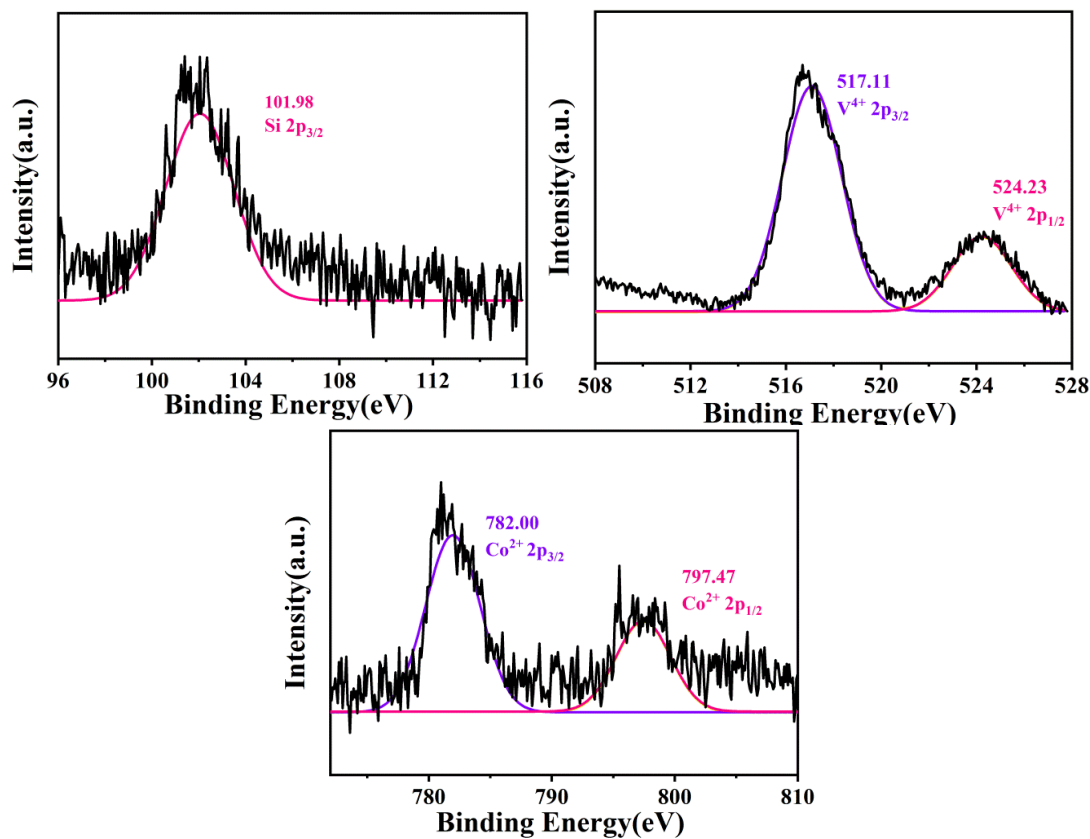

Fig. S6. XPS spectra of compound 2: Si, V, Co.

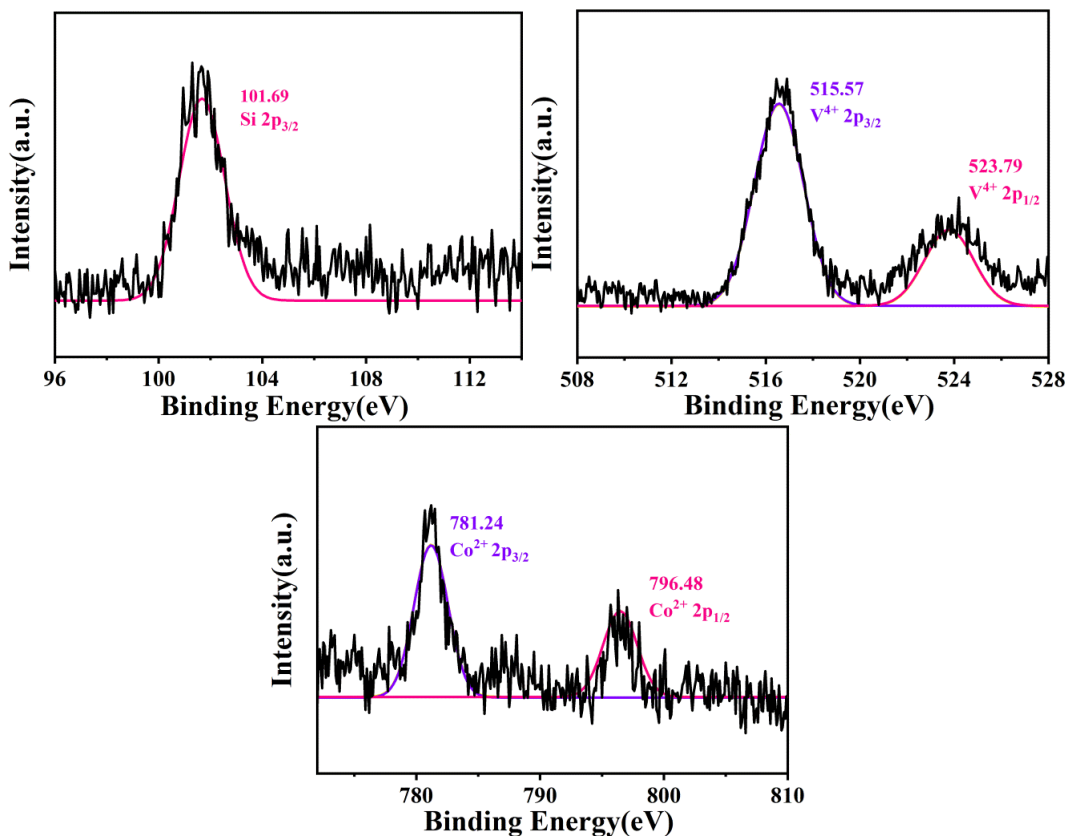

Fig. S7. XPS spectra of compound 3: Si, V, Co.

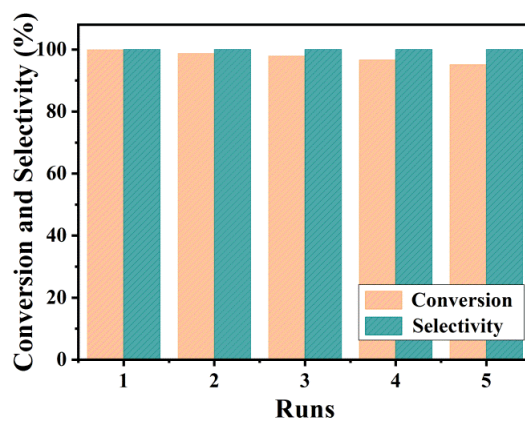

Fig. S8. Recycling of compound 1 for Knoevenagel condensation.

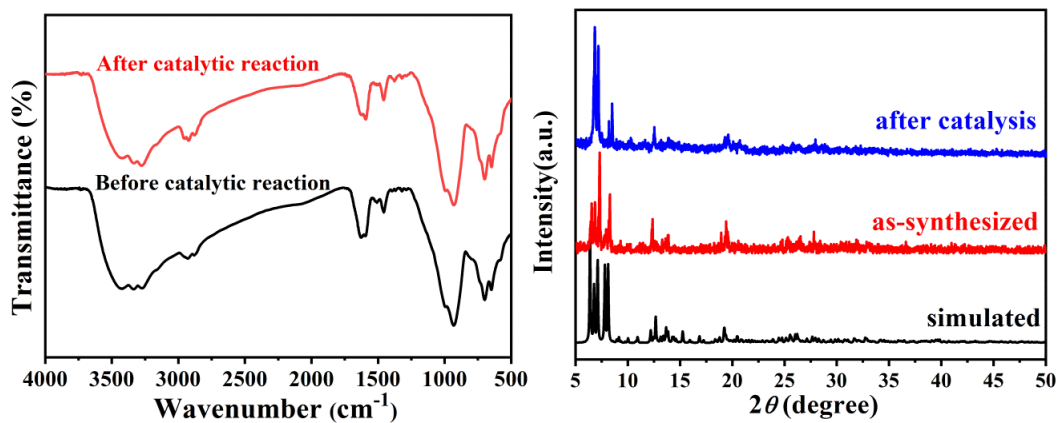

Fig. S9. The FT-IR spectra and PXRD patterns of the reused compound 1 in the Knoevenagel condensation.

As shown in Fig. S10, SEM images (Fig. S10 a, b and c) revealed that compounds **1-3** are block crystals. Fig. S10 d, e and f shows the powder images of compounds **1-3** with irregular laminations, respectively.

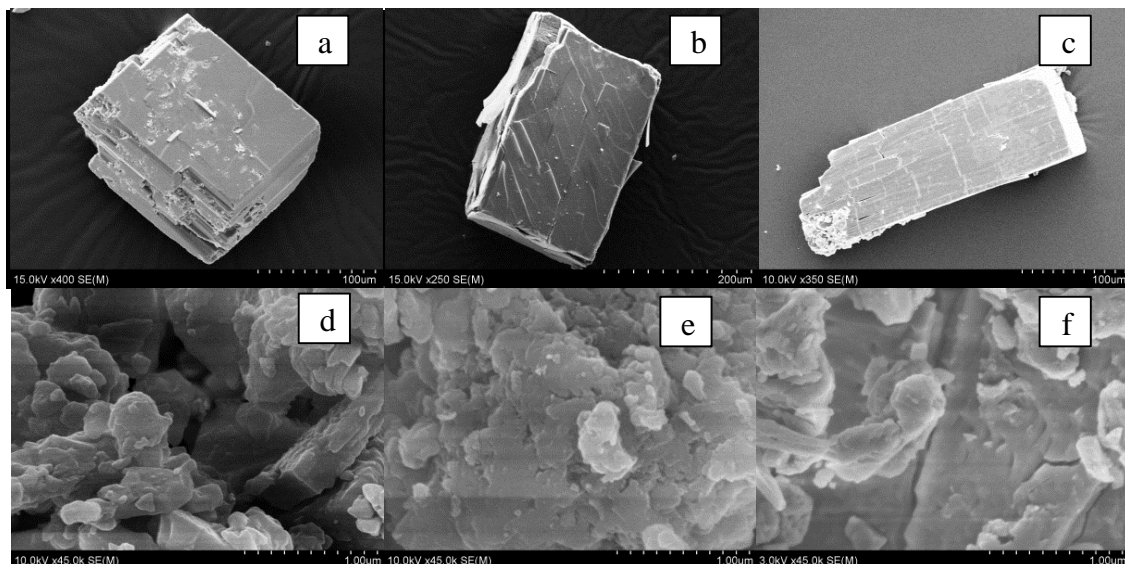

**Fig. S10.** SEM images of crystal and powder in compounds **1-3**.

The measured BET specific surface areas and pore size of the catalyst powder are shown in Fig. S11 and Table S4. The specific surface area and pore size of compound **1** is slightly higher than that of compound **2** and **3**. It is explained that compound **1** had better catalytic activity than compound **2** and **3**. Compounds **1-3** are mesoporous with an average pore diameter of 35 nm for **1**, 32.5 nm for **2** and 22.96 nm for **3**, respectively.

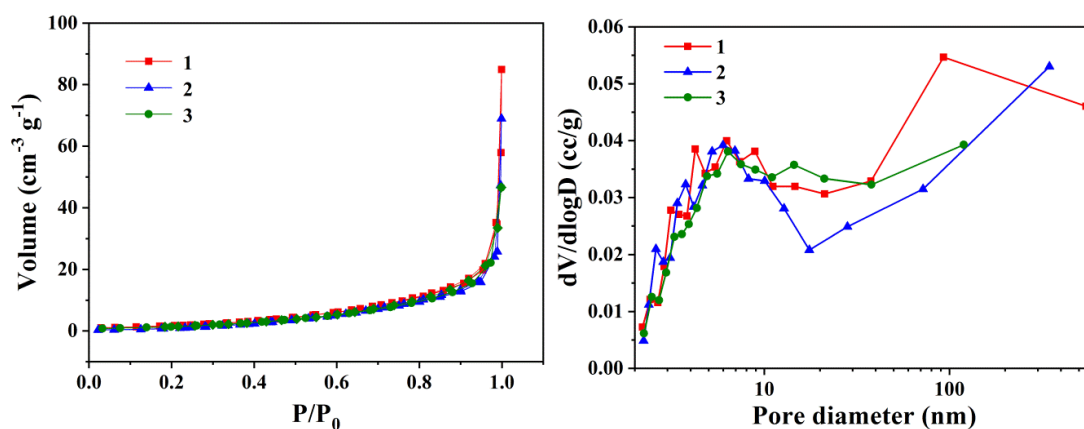

**Fig. S11.** N<sub>2</sub> adsorption-desorption isotherm and pore-size distribution of compounds **1-3**.

**Table S4.** The parameters of BET surface area and pore size of compounds **1-3**.

| Compound | BET surface area [m <sup>2</sup> g <sup>-1</sup> ] | Pore size [nm] |
|----------|----------------------------------------------------|----------------|
| <b>1</b> | 7.5049                                             | 35             |

|   |        |       |
|---|--------|-------|
| 2 | 6.5638 | 32.5  |
| 3 | 6.2756 | 22.96 |

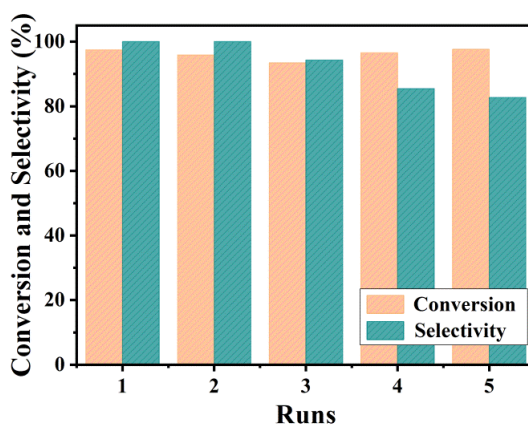

**Fig. S12.** Recycling of compound **1** for catalytic oxidation of styrene.

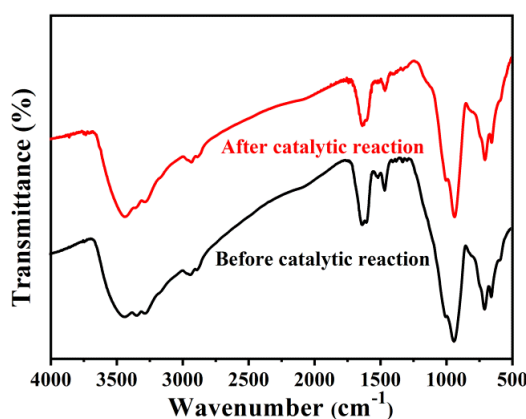

**Fig. S13.** The FT-IR spectra of the reused compound **1** in the catalytic oxidation of styrene.

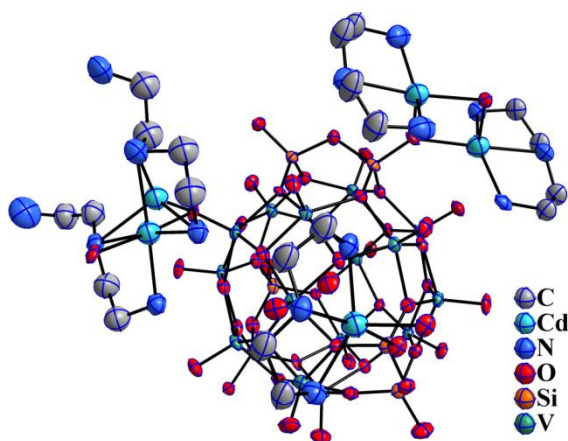

**Fig. S14.** Diagram showing anisotropic displacement parameters (ADPs) of compound **1**, with the thermal ellipsoids shown at a 30% probability level. All hydrogen atoms are omitted for clarity.

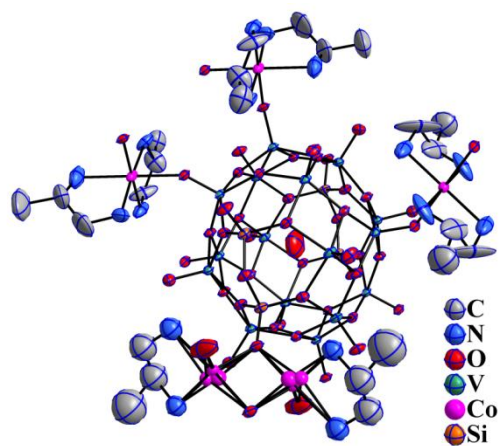

**Fig. S15.** Diagram showing anisotropic displacement parameters (ADPs) of compound **2**, with the thermal ellipsoids shown at a 30% probability level. All hydrogen atoms are omitted for clarity.

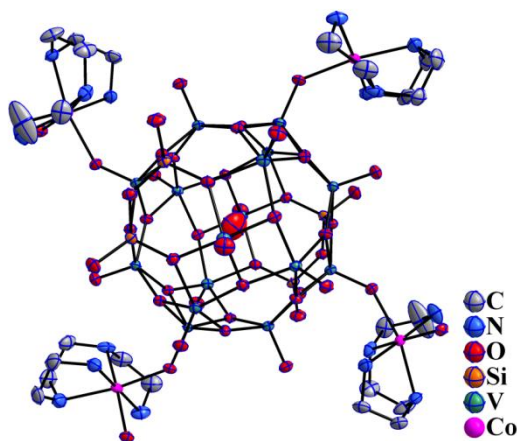

**Fig. S16.** Diagram showing anisotropic displacement parameters (ADPs) of compound **3**, with the thermal ellipsoids shown at a 30% probability level. All hydrogen atoms are omitted for clarity.

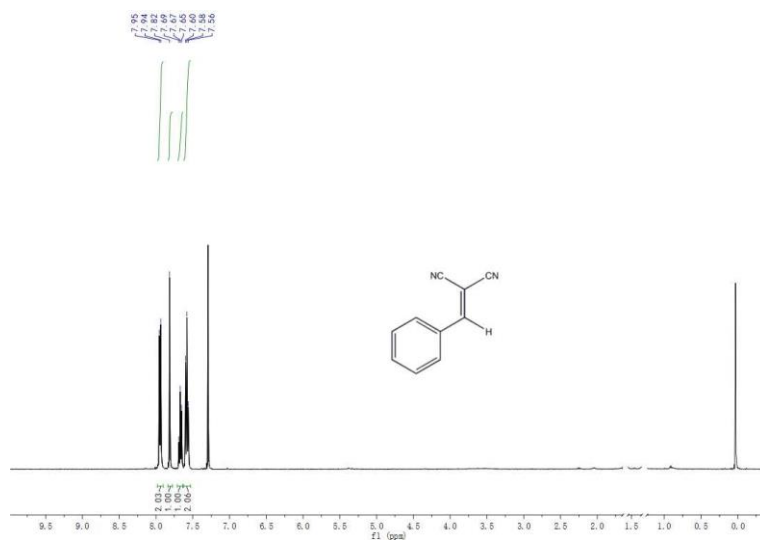

(a)  $^1\text{H}$  NMR spectrum of 2-benzylidenemalononitrile in  $\text{CDCl}_3$ .

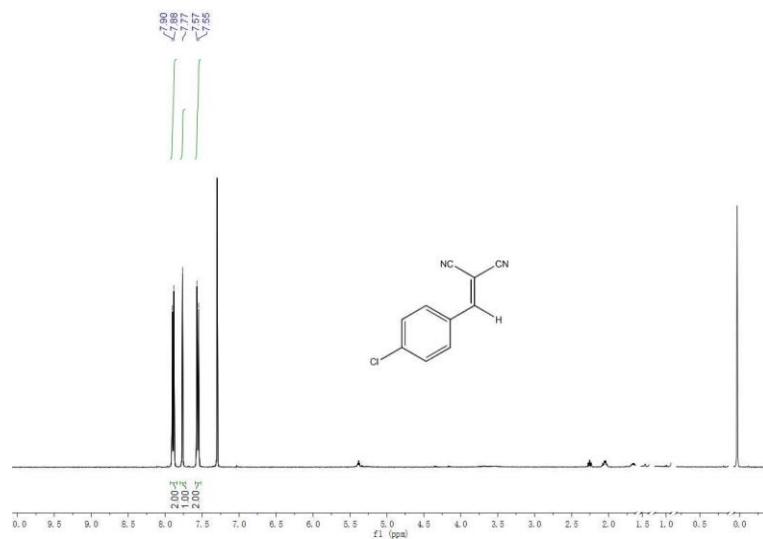

(b)  $^1\text{H}$  NMR spectrum of 2-(4-chlorobenzylidene)malononitrile in  $\text{CDCl}_3$ .

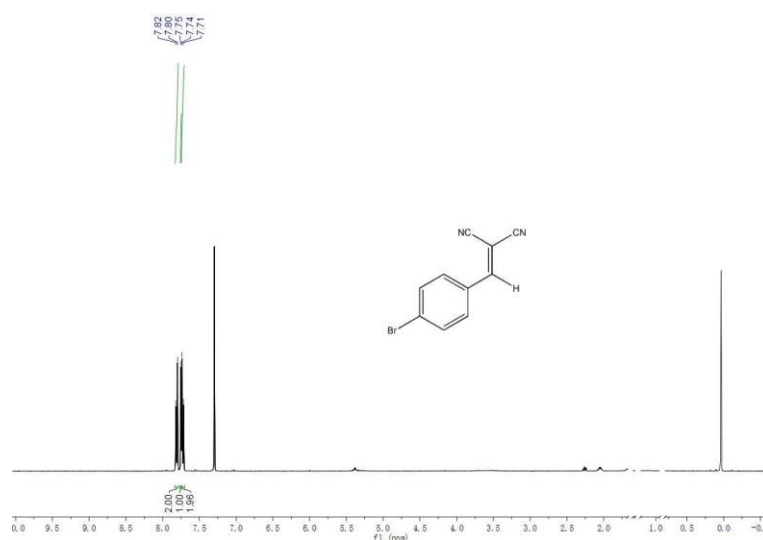

(c)  $^1\text{H}$  NMR spectrum of 2-(4-bromobenzylidene)malononitrile in  $\text{CDCl}_3$ .

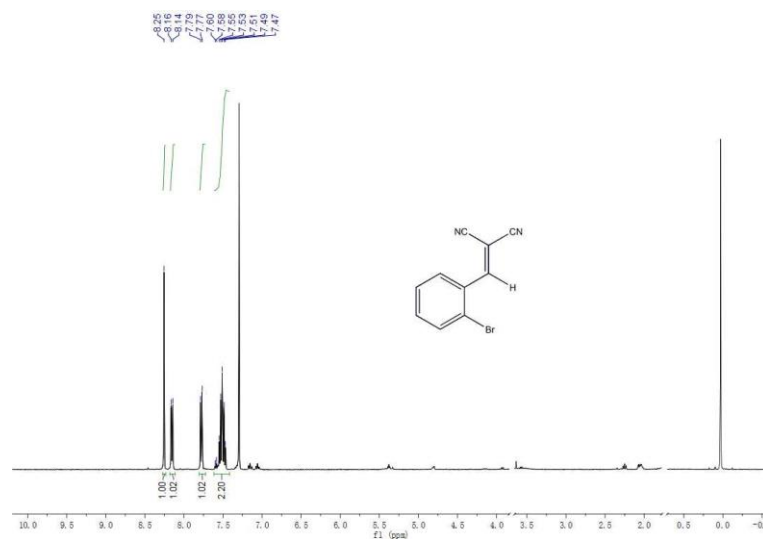

(d)  $^1\text{H}$  NMR spectrum of 2-(2-bromobenzylidene)malononitrile in  $\text{CDCl}_3$ .



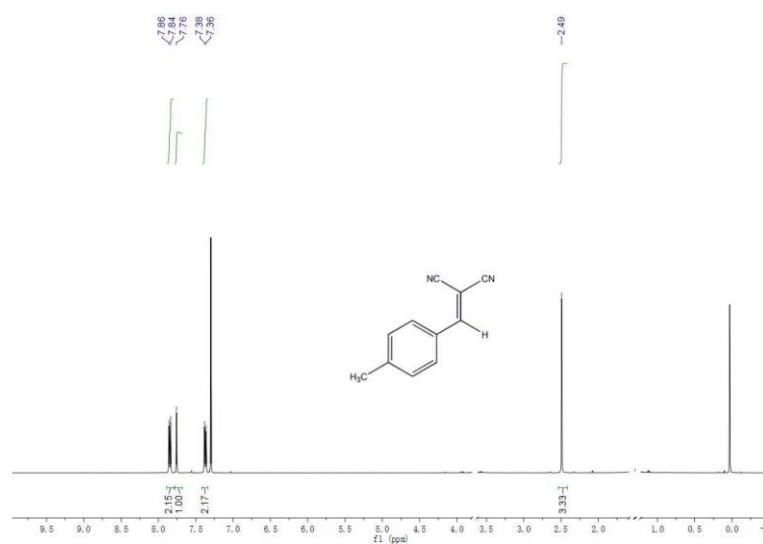

(e)  $^1\text{H}$  NMR spectrum of 2-(4-methylbenzylidene)malononitrile in  $\text{CDCl}_3$ .

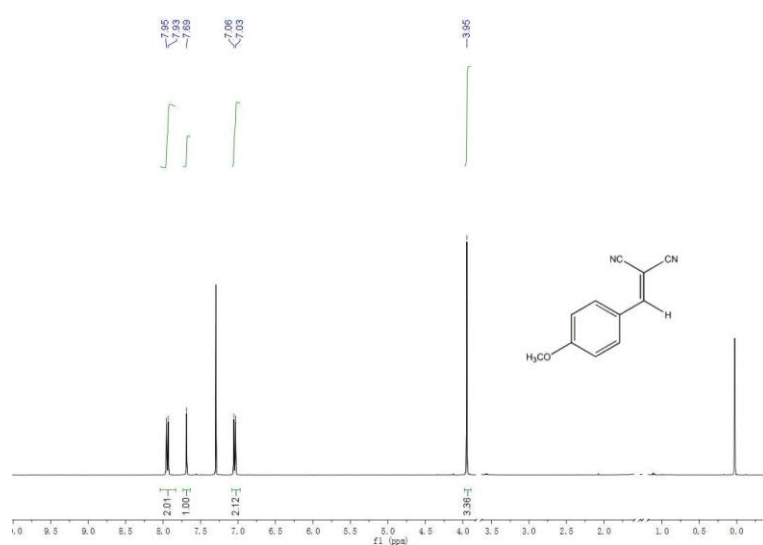

(f)  $^1\text{H}$  NMR spectrum of 2-(4-methoxybenzylidene)malononitrile in  $\text{CDCl}_3$ .

**Fig. S17.**  $^1\text{H}$  NMR spectra of the products from the Knoevenagel condensation reactions.

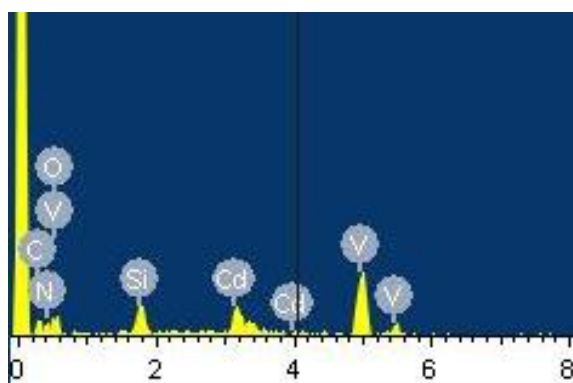

**Fig. S18.** The EDS spectra of compound **1**.

**$R_1=10.91\%$** 

## Crystal Data and Experimental

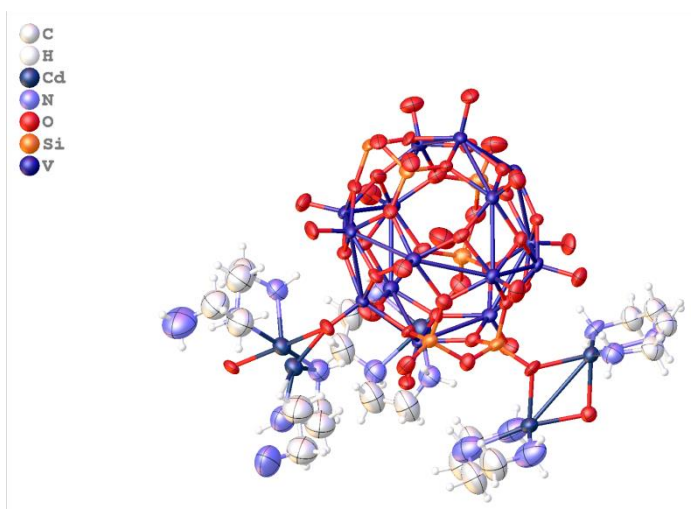

**Experimental.** Single brown block-shaped crystals of **1** were used as supplied. A suitable crystal with dimensions  $0.15 \times 0.13 \times 0.10 \text{ mm}^3$  was selected and mounted on a CCD area detector diffractometer. The crystal was kept at a steady  $T = 296(2) \text{ K}$  during data collection. The structure was solved with the **ShelXL-2018/3** (Sheldrick, 2018) solution program using **?** and by using **Olex2 1.5** (Dolomanov et al., 2009) as the graphical interface. The model was refined with **ShelXL-2018/3** (Sheldrick, 2018) using full matrix least squares minimisation on  $F^2$ .

**Crystal Data.**  $\text{C}_{20}\text{H}_{85}\text{Cd}_4\text{N}_{15}\text{O}_{56}\text{Si}_6\text{V}_{15}$ ,  $M_r = 2814.27$ , monoclinic,  $C2/c$  (No. 15),  $a = 20.788(4) \text{ \AA}$ ,  $b = 19.333(3) \text{ \AA}$ ,  $c = 44.011(8) \text{ \AA}$ ,  $\beta = 98.456(3)^\circ$ ,  $\alpha = \gamma = 90^\circ$ ,  $V = 17495(5) \text{ \AA}^3$ ,  $T = 296(2) \text{ K}$ ,  $Z = 8$ ,  $Z' = 1$ ,  $\mu(\text{MoK}\alpha) = 2.651$ , 42993 reflections measured, 15385 unique ( $R_{\text{int}} = 0.0419$ ) which were used in all calculations. The final  $wR_2$  was 0.2612 (all data) and  $R_1$  was 0.1091 ( $I \geq 2 \sigma(I)$ ).



| <b>Compound</b>                                | <b>1</b>                                                                                                        |
|------------------------------------------------|-----------------------------------------------------------------------------------------------------------------|
| Formula                                        | C <sub>20</sub> H <sub>85</sub> Cd <sub>4</sub> N <sub>15</sub> O <sub>56</sub> Si <sub>6</sub> V <sub>15</sub> |
| <i>D</i> <sub>calc.</sub> / g cm <sup>-3</sup> | 2.137                                                                                                           |
| $\mu$ /mm <sup>-1</sup>                        | 2.651                                                                                                           |
| Formula Weight                                 | 2814.27                                                                                                         |
| Colour                                         | brown                                                                                                           |
| Shape                                          | block-shaped-shaped                                                                                             |
| Size/mm <sup>3</sup>                           | 0.15×0.13×0.10                                                                                                  |
| <i>T</i> /K                                    | 296(2)                                                                                                          |
| Crystal System                                 | monoclinic                                                                                                      |
| Space Group                                    | <i>C</i> 2/ <i>c</i>                                                                                            |
| <i>a</i> /Å                                    | 20.788(4)                                                                                                       |
| <i>b</i> /Å                                    | 19.333(3)                                                                                                       |
| <i>c</i> /Å                                    | 44.011(8)                                                                                                       |
| $\alpha$ /°                                    | 90                                                                                                              |
| $\beta$ /°                                     | 98.456(3)                                                                                                       |
| $\gamma$ /°                                    | 90                                                                                                              |
| <i>V</i> /Å <sup>3</sup>                       | 17495(5)                                                                                                        |
| <i>Z</i>                                       | 8                                                                                                               |
| <i>Z</i> '                                     | 1                                                                                                               |
| Wavelength/Å                                   | 0.71073                                                                                                         |
| Radiation type                                 | MoK $\alpha$                                                                                                    |
| $\theta$ <sub>min</sub> /°                     | 1.446                                                                                                           |
| $\theta$ <sub>max</sub> /°                     | 25.000                                                                                                          |
| Measured Refl's.                               | 42993                                                                                                           |
| Indep't Refl's                                 | 15385                                                                                                           |
| Refl's I $\geq$ 2 $\sigma$ (I)                 | 11750                                                                                                           |
| <i>R</i> <sub>int</sub>                        | 0.0419                                                                                                          |
| Parameters                                     | 986                                                                                                             |
| Restraints                                     | 258                                                                                                             |
| Largest Peak                                   | 4.195                                                                                                           |
| Deepest Hole                                   | -3.168                                                                                                          |
| GooF                                           | 1.084                                                                                                           |
| <i>wR</i> <sub>2</sub> (all data)              | 0.2612                                                                                                          |
| <i>wR</i> <sub>2</sub>                         | 0.2530                                                                                                          |
| <i>R</i> <sub>1</sub> (all data)               | 0.1329                                                                                                          |
| <i>R</i> <sub>1</sub>                          | 0.1091                                                                                                          |

## Structure Quality Indicators

|                     |                                 |              |                        |             |                 |              |                   |              |
|---------------------|---------------------------------|--------------|------------------------|-------------|-----------------|--------------|-------------------|--------------|
| <b>Reflections:</b> | d min (Mo)<br>2 $\theta$ =50.0° | <b>0.84</b>  | I/ $\sigma$ (I)<br>CIF | <b>19.5</b> | Rint<br>CIF     | <b>4.19%</b> | Full 50.0°<br>CIF | <b>99.8</b>  |
| <b>Refinement:</b>  | Shift<br>CIF                    | <b>0.011</b> | Max Peak<br>CIF        | <b>4.2</b>  | Min Peak<br>CIF | <b>-3.2</b>  | Goof<br>CIF       | <b>1.084</b> |

A brown block-shaped-shaped-shaped crystal with dimensions  $0.15 \times 0.13 \times 0.10 \text{ mm}^3$  was mounted. Data were collected using a CCD area detector diffractometer operating at  $T = 296(2) \text{ K}$ .

Data were measured ? (d, runs) with  $\text{MoK}_\alpha$  radiation. The diffraction pattern was indexed and the total number of runs and images was based on the strategy calculation from the program SAINT v7.68A (Bruker, 2009). The maximum resolution that was achieved was  $\theta = 25.000^\circ$  ( $0.84 \text{ \AA}$ ).

The unit cell was refined using Bruker ShelXTL on 9994 reflections, 23% of the observed reflections.

Data reduction, scaling and absorption corrections were performed using Bruker ShelXTL. The final completeness is 99.80 % out to  $25.000^\circ$  in  $\theta$ . SADABS (Bruker, 2009). The absorption coefficient  $\mu$  of this material is  $2.651 \text{ mm}^{-1}$  at this wavelength ( $\lambda = 0.71073 \text{ \AA}$ ) and the minimum and maximum transmissions are 0.679 and 0.768.

The structure was solved and the space group  $C2/c$  (# 15) determined by the ShelXL-2018/3 (Sheldrick, 2018) structure solution program using using ? and refined by full matrix least squares minimisation on  $F^2$  using version 2018/3 of **ShelXL-2018/3** (Sheldrick, 2018). All non-hydrogen atoms were refined anisotropically. Hydrogen atom positions were calculated geometrically and refined using the riding model. Hydrogen atom positions were calculated geometrically and refined using the riding model.

*\_exptl\_absorpt\_process\_details*: SADABS (Bruker, 2009)

There is a single molecule in the asymmetric unit, which is represented by the reported sum formula. In other words: Z is 8 and Z' is 1.

## Data Plots: Diffraction Data

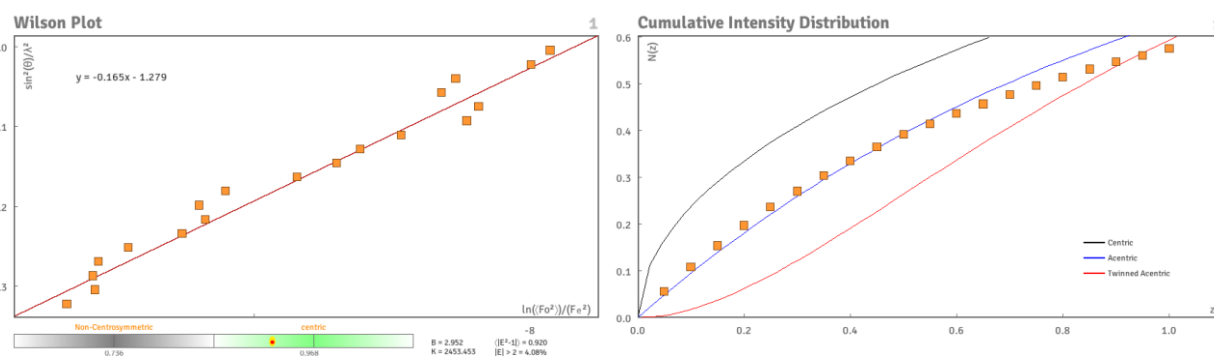

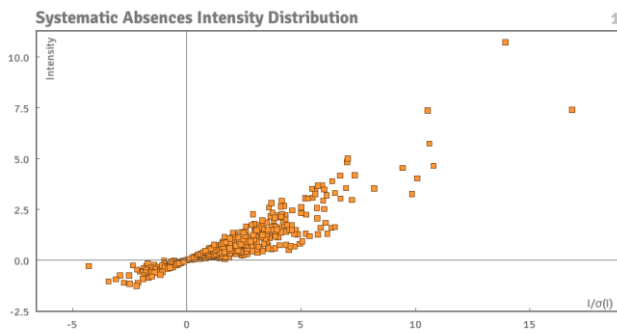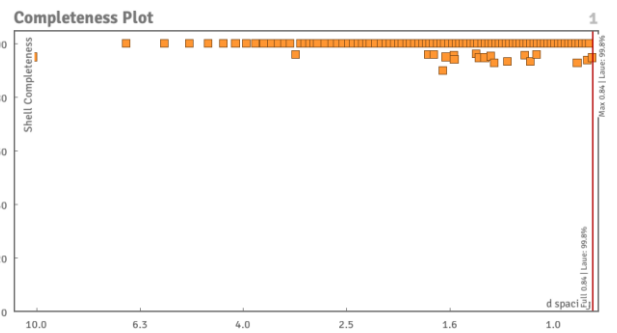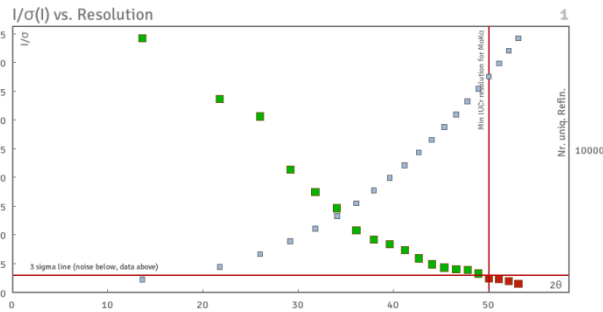

## Data Plots: Refinement and Data

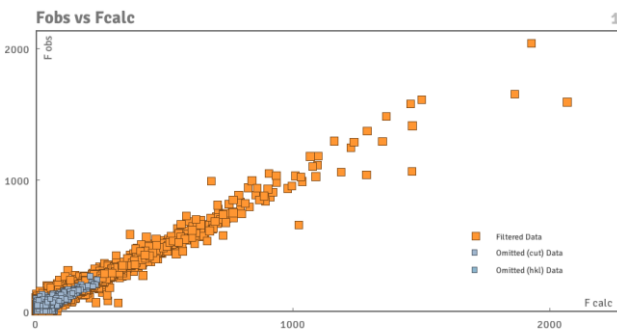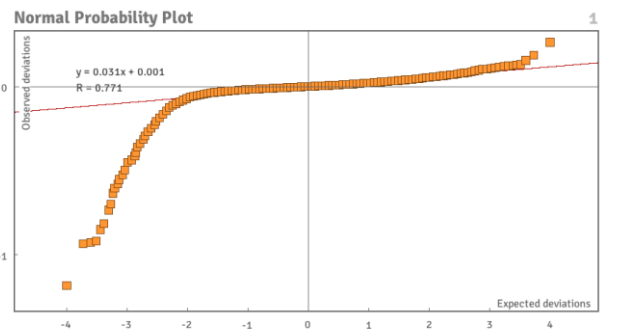

## Citations

O.V. Dolomanov and L.J. Bourhis and R.J. Gildea and J.A.K. Howard and H. Puschmann, Olex2: A complete structure solution, refinement and analysis program, *J. Appl. Cryst.*, (2009), **42**, 339-341.

SADABS, Bruker axs, Madison, WI (?).

ShelXTL, Bruker axs, Madison, WI (?).

Sheldrick, G.M., A short history of ShelX, *Acta Cryst.*, (2008), **A64**, 339-341.

Sheldrick, G.M., Crystal structure refinement with ShelXL, *Acta Cryst.*, (2015), **C71**, 3-8.

**$R_1=4.89\%$** 

## Crystal Data and Experimental

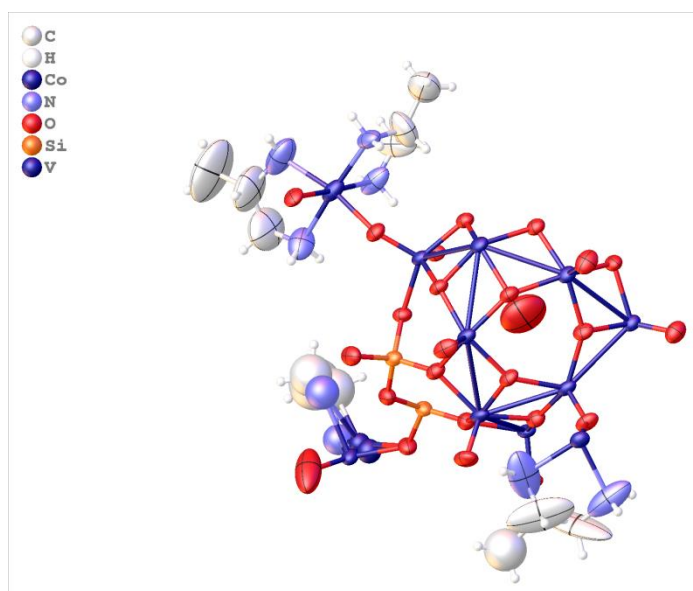

**Experimental.** Single brown strip-shaped crystals of **2** were used as supplied. A suitable crystal with dimensions  $0.11 \times 0.09 \times 0.04 \text{ mm}^3$  was selected and mounted on a CCD area detector diffractometer. The crystal was kept at a steady  $T = 296(2) \text{ K}$  during data collection. The structure was solved with the **ShelXL-2018/3** (Sheldrick, 2018) solution program using  $\text{?}$  and by using **Olex2 1.5** (Dolomanov et al., 2009) as the graphical interface. The model was refined with **ShelXL-2018/3** (Sheldrick, 2018) using full matrix least squares minimisation on  $F^2$ .

**Crystal Data.**  $\text{C}_{24}\text{H}_{100}\text{N}_{16}\text{O}_{54}\text{V}_{16}\text{Co}_5\text{Si}_4$ ,  $M_r = 2699.24$ , triclinic,  $P-1$  (No. 2),  $a = 12.9632(9) \text{ \AA}$ ,  $b = 13.8288(10) \text{ \AA}$ ,  $c = 14.4745(11) \text{ \AA}$ ,  $\alpha = 91.7840(10)^\circ$ ,  $\beta = 98.7650(10)^\circ$ ,  $\gamma = 96.3390(10)^\circ$ ,  $V = 2545.8(3) \text{ \AA}^3$ ,  $T = 296(2) \text{ K}$ ,  $Z = 1$ ,  $Z' = 0.5$ ,  $\mu(\text{MoK}\alpha) = 2.314$ , 12882 reflections measured, 8858 unique ( $R_{\text{int}} = 0.0174$ ) which were used in all calculations. The final  $wR_2$  was 0.1458 (all data) and  $R_1$  was 0.0489 ( $I \geq 2 \sigma(I)$ ).

| <b>Compound</b>                                | <b>2</b>                                                                                                         |
|------------------------------------------------|------------------------------------------------------------------------------------------------------------------|
| Formula                                        | C <sub>24</sub> H <sub>100</sub> N <sub>16</sub> O <sub>54</sub> V <sub>16</sub> Co <sub>5</sub> Si <sub>4</sub> |
| <i>D</i> <sub>calc.</sub> / g cm <sup>-3</sup> | 1.761                                                                                                            |
| $\mu$ /mm <sup>-1</sup>                        | 2.314                                                                                                            |
| Formula Weight                                 | 2699.24                                                                                                          |
| Colour                                         | brown                                                                                                            |
| Shape                                          | strip-shaped                                                                                                     |
| Size/mm <sup>3</sup>                           | 0.11×0.09×0.04                                                                                                   |
| <i>T</i> /K                                    | 296(2)                                                                                                           |
| Crystal System                                 | triclinic                                                                                                        |
| Space Group                                    | <i>P</i> -1                                                                                                      |
| <i>a</i> /Å                                    | 12.9632(9)                                                                                                       |
| <i>b</i> /Å                                    | 13.8288(10)                                                                                                      |
| <i>c</i> /Å                                    | 14.4745(11)                                                                                                      |
| $\alpha$ /°                                    | 91.7840(10)                                                                                                      |
| $\beta$ /°                                     | 98.7650(10)                                                                                                      |
| $\gamma$ /°                                    | 96.3390(10)                                                                                                      |
| <i>V</i> /Å <sup>3</sup>                       | 2545.8(3)                                                                                                        |
| <i>Z</i>                                       | 1                                                                                                                |
| <i>Z</i> '                                     | 0.5                                                                                                              |
| Wavelength/Å                                   | 0.71073                                                                                                          |
| Radiation type                                 | MoK $\alpha$                                                                                                     |
| $\theta$ <sub>min</sub> /°                     | 1.483                                                                                                            |
| $\theta$ <sub>max</sub> /°                     | 24.999                                                                                                           |
| Measured Refl's.                               | 12882                                                                                                            |
| Indep't Refl's                                 | 8858                                                                                                             |
| Refl's I $\geq$ 2 $\sigma$ (I)                 | 7173                                                                                                             |
| <i>R</i> <sub>int</sub>                        | 0.0174                                                                                                           |
| Parameters                                     | 495                                                                                                              |
| Restraints                                     | 2                                                                                                                |
| Largest Peak                                   | 1.584                                                                                                            |
| Deepest Hole                                   | -0.916                                                                                                           |
| GooF                                           | 1.019                                                                                                            |
| <i>wR</i> <sub>2</sub> (all data)              | 0.1458                                                                                                           |
| <i>wR</i> <sub>2</sub>                         | 0.1393                                                                                                           |
| <i>R</i> <sub>1</sub> (all data)               | 0.0583                                                                                                           |
| <i>R</i> <sub>1</sub>                          | 0.0489                                                                                                           |

## Structure Quality Indicators

|                     |                                    |              |                      |             |                 |              |                   |              |
|---------------------|------------------------------------|--------------|----------------------|-------------|-----------------|--------------|-------------------|--------------|
| <b>Reflections:</b> | d min (Mo)<br>$2\theta=50.0^\circ$ | <b>0.84</b>  | $I/\sigma(I)$<br>CIF | <b>28.5</b> | Rint<br>CIF     | <b>1.74%</b> | Full $50.0^\circ$ | <b>98.7</b>  |
| <b>Refinement:</b>  | Shift<br>CIF                       | <b>0.012</b> | Max Peak<br>CIF      | <b>1.6</b>  | Min Peak<br>CIF | <b>-0.9</b>  | Goof<br>CIF       | <b>1.019</b> |

A brown strip-shaped crystal with dimensions  $0.11 \times 0.09 \times 0.04 \text{ mm}^3$  was mounted. Data were collected using a CCD area detector diffractometer operating at  $T = 296(2) \text{ K}$ .

Data were measured ? (d, runs) with  $\text{MoK}\alpha$  radiation. The diffraction pattern was indexed and the total number of runs and images was based on the strategy calculation from the program SAINT v7.68A (Bruker, 2009). The maximum resolution that was achieved was  $\theta = 24.999^\circ$  ( $0.84 \text{ \AA}$ ).

The unit cell was refined using Bruker ShelXTL on 15841 reflections, 123% of the observed reflections.

Data reduction, scaling and absorption corrections were performed using Bruker ShelXTL. The final completeness is 98.70 % out to  $24.999^\circ$  in  $\theta$ . SADABS (Bruker, 2009). The absorption coefficient  $\mu$  of this material is  $2.314 \text{ mm}^{-1}$  at this wavelength ( $\lambda = 0.71073 \text{ \AA}$ ) and the minimum and maximum transmissions are 0.779 and 0.912.

The structure was solved and the space group  $P-1$  (# 2) determined by the ShelXL-2018/3 (Sheldrick, 2018) structure solution program using using ? and refined by full matrix least squares minimisation on  $F^2$  using version 2018/3 of **ShelXL-2018/3** (Sheldrick, 2018). All non-hydrogen atoms were refined anisotropically. Hydrogen atom positions were calculated geometrically and refined using the riding model. Hydrogen atom positions were calculated geometrically and refined using the riding model.

*\_exptl\_absorpt\_process\_details*: SADABS (Bruker, 2009)

The value of  $Z'$  is 0.5. This means that only half of the formula unit is present in the asymmetric unit, with the other half consisting of symmetry equivalent atoms.

## Data Plots: Diffraction Data

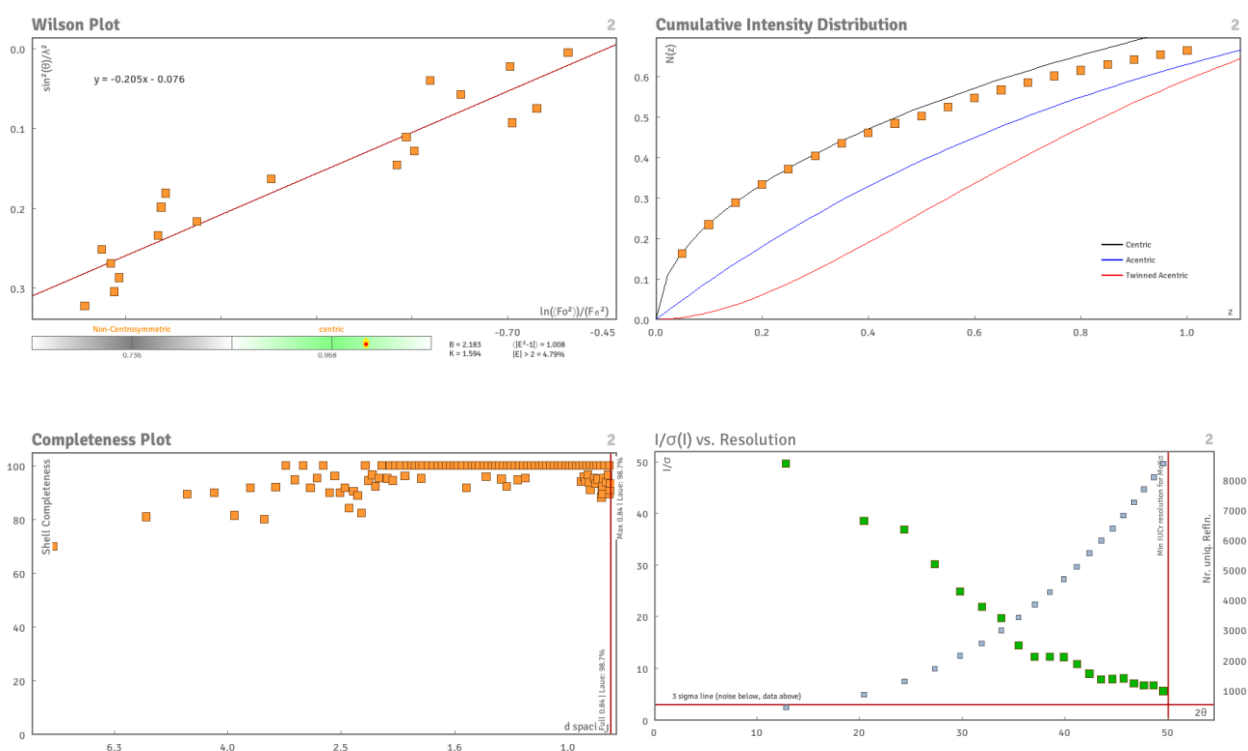

## Data Plots: Refinement and Data

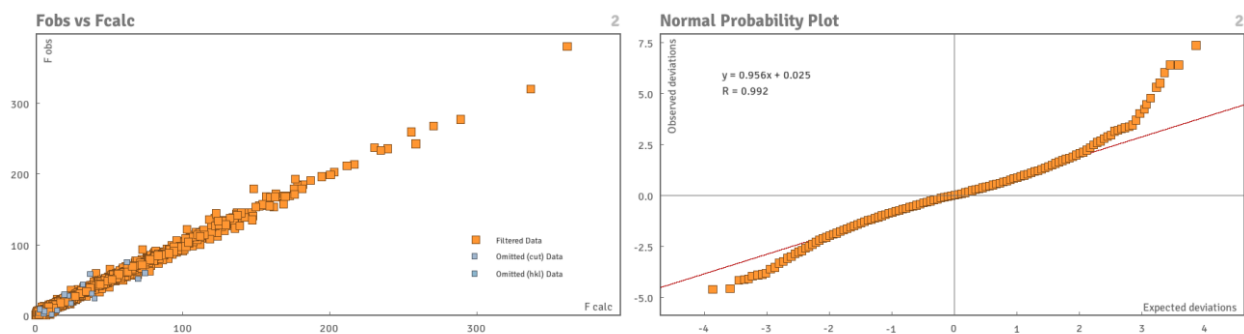

## Citations

O.V. Dolomanov and L.J. Bourhis and R.J. Gildea and J.A.K. Howard and H. Puschmann, Olex2: A complete structure solution, refinement and analysis program, *J. Appl. Cryst.*, (2009), **42**, 339-341.

SADABS, Bruker axs, Madison, WI (?).

ShelXTL, Bruker axs, Madison, WI (?).

Sheldrick, G.M., A short history of ShelX, *Acta Cryst.*, (2008), **A64**, 339-341.

Sheldrick, G.M., Crystal structure refinement with ShelXL, *Acta Cryst.*, (2015), **C71**, 3-8.

**$R_1=4.63\%$** 

## Crystal Data and Experimental

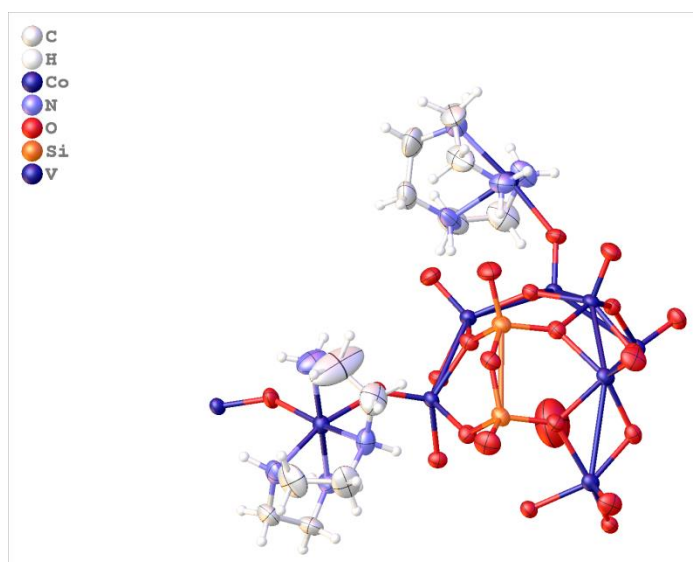

**Experimental.** Single brown strip-shaped crystals of **3** were used as supplied. A suitable crystal with dimensions  $0.16 \times 0.06 \times 0.03 \text{ mm}^3$  was selected and mounted on a CCD area detector diffractometer. The crystal was kept at a steady  $T = 296(2) \text{ K}$  during data collection. The structure was solved with the **ShelXL-2018/3** (Sheldrick, 2018) solution program using  $\omega$  and by using **Olex2** 1.5 (Dolomanov et al., 2009) as the graphical interface. The model was refined with **ShelXL-2018/3** (Sheldrick, 2018) using full matrix least squares minimisation on  $F^2$ .

**Crystal Data.**  $\text{C}_{24}\text{H}_{98}\text{N}_{16}\text{O}_{57}\text{Si}_4\text{V}_{16}\text{Co}_4$ ,  $M_r = 2686.30$ , triclinic,  $P-1$  (No. 2),  $a = 12.8549(13) \text{ \AA}$ ,  $b = 13.2678(13) \text{ \AA}$ ,  $c = 14.8024(14) \text{ \AA}$ ,  $\alpha = 69.796(2)^\circ$ ,  $\beta = 64.329(2)^\circ$ ,  $\gamma = 81.152(2)^\circ$ ,  $V = 2135.4(4) \text{ \AA}^3$ ,  $T = 296(2) \text{ K}$ ,  $Z = 1$ ,  $Z' = 0.5$ ,  $\mu(\text{MoK}\alpha) = 2.575$ , 13452 reflections measured, 9772 unique ( $R_{\text{int}} = 0.0235$ ) which were used in all calculations. The final  $wR_2$  was 0.1313 (all data) and  $R_1$  was 0.0463 ( $I \geq 2 \sigma(I)$ ).



|                                                |                                                                                                                 |
|------------------------------------------------|-----------------------------------------------------------------------------------------------------------------|
| <b>Compound</b>                                | <b>3</b>                                                                                                        |
| Formula                                        | C <sub>24</sub> H <sub>98</sub> N <sub>16</sub> O <sub>57</sub> Si <sub>4</sub> V <sub>16</sub> Co <sub>4</sub> |
| <i>D</i> <sub>calc.</sub> / g cm <sup>-3</sup> | 2.083                                                                                                           |
| $\mu$ /mm <sup>-1</sup>                        | 2.575                                                                                                           |
| Formula Weight                                 | 2686.30                                                                                                         |
| Colour                                         | brown                                                                                                           |
| Shape                                          | strip-shaped                                                                                                    |
| Size/mm <sup>3</sup>                           | 0.16×0.06×0.03                                                                                                  |
| <i>T</i> /K                                    | 296(2)                                                                                                          |
| Crystal System                                 | triclinic                                                                                                       |
| Space Group                                    | <i>P</i> -1                                                                                                     |
| <i>a</i> /Å                                    | 12.8549(13)                                                                                                     |
| <i>b</i> /Å                                    | 13.2678(13)                                                                                                     |
| <i>c</i> /Å                                    | 14.8024(14)                                                                                                     |
| $\alpha$ /°                                    | 69.796(2)                                                                                                       |
| $\beta$ /°                                     | 64.329(2)                                                                                                       |
| $\gamma$ /°                                    | 81.152(2)                                                                                                       |
| <i>V</i> /Å <sup>3</sup>                       | 2135.4(4)                                                                                                       |
| <i>Z</i>                                       | 1                                                                                                               |
| <i>Z</i> '                                     | 0.5                                                                                                             |
| Wavelength/Å                                   | 0.71073                                                                                                         |
| Radiation type                                 | MoK $\alpha$                                                                                                    |
| $\theta$ <sub>min</sub> /°                     | 1.607                                                                                                           |
| $\theta$ <sub>max</sub> /°                     | 28.320                                                                                                          |
| Measured Refl's.                               | 13452                                                                                                           |
| Indep't Refl's                                 | 9772                                                                                                            |
| Refl's I $\geq$ 2 $\sigma$ (I)                 | 6908                                                                                                            |
| <i>R</i> <sub>int</sub>                        | 0.0235                                                                                                          |
| Parameters                                     | 502                                                                                                             |
| Restraints                                     | 3                                                                                                               |
| Largest Peak                                   | 1.250                                                                                                           |
| Deepest Hole                                   | -0.958                                                                                                          |
| GooF                                           | 1.069                                                                                                           |
| <i>wR</i> <sub>2</sub> (all data)              | 0.1313                                                                                                          |
| <i>wR</i> <sub>2</sub>                         | 0.1181                                                                                                          |
| <i>R</i> <sub>1</sub> (all data)               | 0.0704                                                                                                          |
| <i>R</i> <sub>1</sub>                          | 0.0463                                                                                                          |

## Structure Quality Indicators

**Reflections:**

|                   |      |                 |      |      |       |              |      |
|-------------------|------|-----------------|------|------|-------|--------------|------|
| d min (Mo)        | 0.75 | I/ $\sigma$ (I) | 17.1 | Rint | 2.35% | Full 50.5°   | 99.1 |
| 2 $\Theta$ =56.6° |      | CIF             |      | CIF  |       | 92% to 56.6° |      |

**Refinement:**

|       |       |          |     |          |      |      |       |
|-------|-------|----------|-----|----------|------|------|-------|
| Shift | 0.001 | Max Peak | 1.2 | Min Peak | -1.0 | Goof | 1.069 |
| CIF   |       | CIF      |     | CIF      |      | CIF  |       |

A brown strip-shaped crystal with dimensions 0.16 × 0.06 × 0.03 mm<sup>3</sup> was mounted. Data were collected using a CCD area detector diffractometer operating at  $T = 296(2)$  K.

Data were measured (d, runs) with MoK $\alpha$  radiation. The diffraction pattern was indexed and the total number of runs and images was based on the strategy calculation from the program SAINT v7.68A (Bruker, 2009). The maximum resolution that was achieved was  $\Theta = 28.320^\circ$  (0.83 Å).

The unit cell was refined using Bruker ShelXTL on 13452 reflections, 100% of the observed reflections.

Data reduction, scaling and absorption corrections were performed using Bruker ShelXTL. The final completeness is 99.10 % out to 28.320° in  $\Theta$ . A multi-scan absorption correction was performed using ?. The absorption coefficient  $\mu$  of this material is 2.575 mm<sup>-1</sup> at this wavelength ( $\lambda = 0.71073$ Å) and the minimum and maximum transmissions are 0.831 and 0.926.

The structure was solved and the space group  $P-1$  (# 2) determined by the ShelXL-2018/3 (Sheldrick, 2018) structure solution program using using ? and refined by full matrix least squares minimisation on  $F^2$  using version 2018/3 of **ShelXL-2018/3** (Sheldrick, 2018). All non-hydrogen atoms were refined anisotropically. Hydrogen atom positions were calculated geometrically and refined using the riding model. Hydrogen atom positions were calculated geometrically and refined using the riding model.

The value of  $Z'$  is 0.5. This means that only half of the formula unit is present in the asymmetric unit, with the other half consisting of symmetry equivalent atoms.

## Data Plots: Diffraction Data

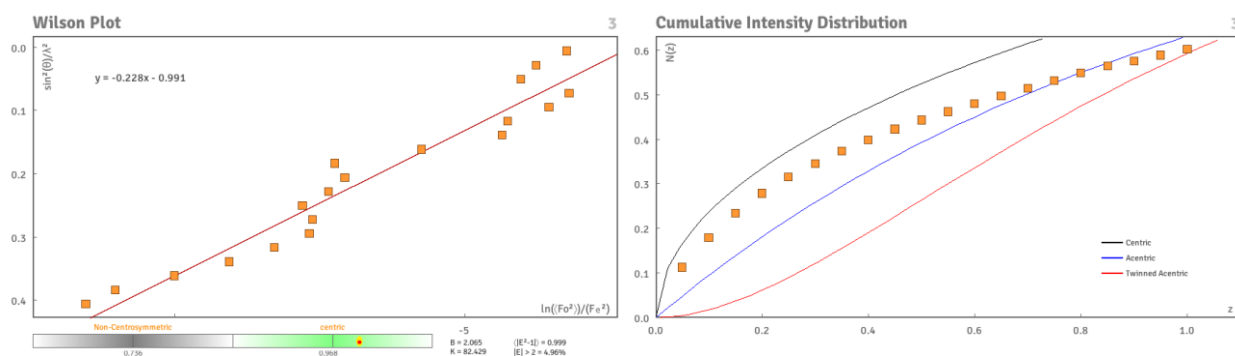

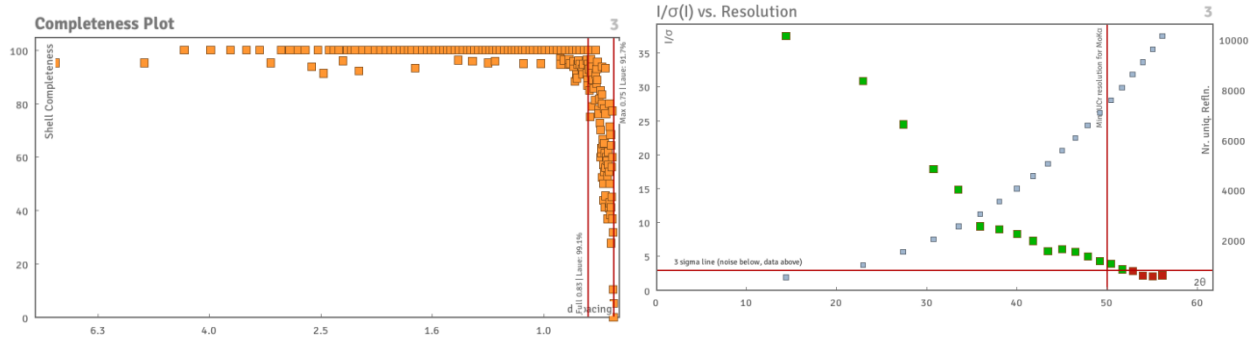

## Data Plots: Refinement and Data

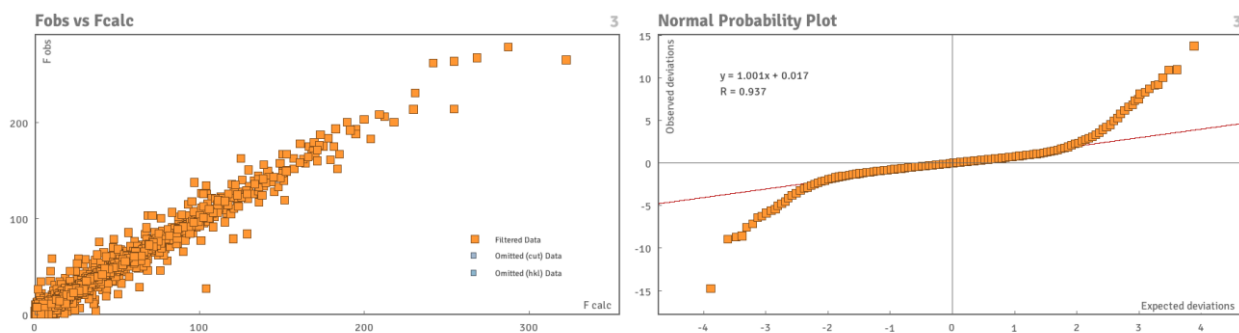

## Citations

O.V. Dolomanov and L.J. Bourhis and R.J. Gildea and J.A.K. Howard and H. Puschmann, Olex2: A complete structure solution, refinement and analysis program, *J. Appl. Cryst.*, (2009), **42**, 339-341.

ShelXTL, Bruker axs, Madison, WI (?).

Sheldrick, G.M., A short history of ShelX, *Acta Cryst.*, (2008), **A64**, 339-341.

Sheldrick, G.M., Crystal structure refinement with ShelXL, *Acta Cryst.*, (2015), **C71**, 3-8.
